# Supplementary material for: High-resolution, genome-wide mapping of positive supercoiling in chromosomes
Source: eLife journal article supplement (doi:10.7554/elife.67236), 2021-07-19
Supplement: supp [file elife-67236-supp-v1.zip]

Archive with 9 entries (9 files):
- elife_poa_e67236_Transparent_Reporting_File.docx
- elife_poa_e67236_Figure_1_figure_supplement_1.pdf
- elife_poa_e67236_Figure_2_figure_supplement_1.pdf
- elife_poa_e67236_Figure_2_figure_supplement_2.pdf
- elife_poa_e67236_Figure_3_figure_supplement_1.pdf
- elife_poa_e67236_Figure_4_figure_supplement_1.pdf
- elife_poa_e67236_Figure_5_figure_supplement_1.pdf
- elife_poa_e67236_Figure_6_figure_supplement_1.pdf
- elife_poa_e67236_Figure_7_figure_supplement_1.pdf
