# Supplementary material for: High-resolution, genome-wide mapping of positive supercoiling in chromosomes
Source: eLife journal article supplement (doi:10.7554/elife.67236), 2021-07-19
Supplement: supp [file elife-67236-supp-v1.zip › elife_poa_e67236_Figure_2_figure_supplement_2.pdf]

(A) GapR ChIP-seq profiles in the absence (orange) and presence (pink) of the transcriptional inhibitor rifampicin (top). Transcription on the forward (green) and reverse (blue) strands with annotated genes indicated (bottom). Terminators on the top strand are indicated.

(B) GapR profiles as in (A). Shaded region shows GapR ChIP generated by the *minCDE* transcript that is also at the 3' end of the *ycmJ-ycgI* locus.
