# Supplementary material for: High-resolution, genome-wide mapping of positive supercoiling in chromosomes
Source: eLife journal article supplement (doi:10.7554/elife.67236), 2021-07-19
Supplement: supp [file elife-67236-supp-v1.zip › elife_poa_e67236_Figure_3_figure_supplement_1.pdf]

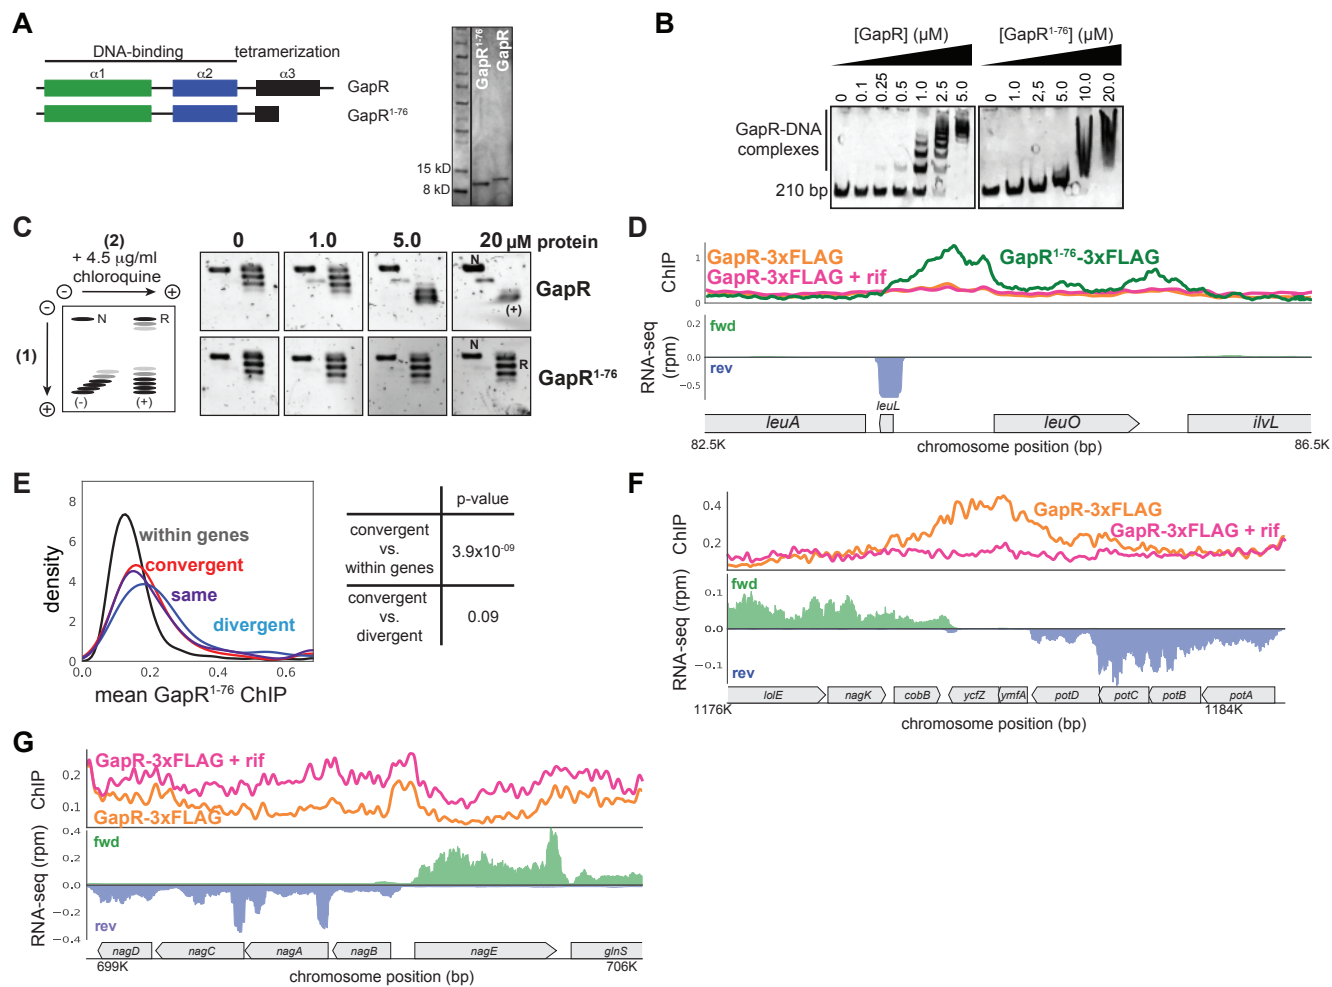

**Figure 3-figure supplement 1. GapR full-length and truncation variant ChIP-seq.**

- (A) Schematic and purification gel of full-length GapR and tetramerization-deficient GapR<sup>1-76</sup>.
- (B) Electrophoretic mobility shift assays of full-length and GapR<sup>1-76</sup> binding to 210 bp DNA.
- (C) Analysis of ligation products from Fig. 3A with 2D-chloroquine electrophoresis. Migration of different plasmid forms are diagrammed (left): N, nicked; R, relaxed; L, linear; (-), negatively supercoiled; (+), positively supercoiled.
- (D) GapR<sup>1-76</sup> ChIP-seq (green) and GapR ChIP-seq profiles in the absence (orange) and presence (pink) of the transcriptional inhibitor rifampicin (top). Transcription on the forward (green) and reverse (blue) strands with annotated genes indicated (bottom).
- (E) Mean GapR<sup>1-76</sup> ChIP in the middle of gene bodies (black), divergently transcribed regions (blue), convergently transcribed regions (red), and where transcription is in the same orientation (purple).
- (F) GapR profiles as in (D) showing GapR accumulation at a representative region of convergent transcription.
- (G) GapR profiles as in (D) showing GapR de-enrichment at a representative region of divergent transcription.
