# Supplementary material for: High-resolution, genome-wide mapping of positive supercoiling in chromosomes
Source: eLife journal article supplement (doi:10.7554/elife.67236), 2021-07-19
Supplement: supp [file elife-67236-supp-v1.zip › elife_poa_e67236_Figure_7_figure_supplement_1.pdf]

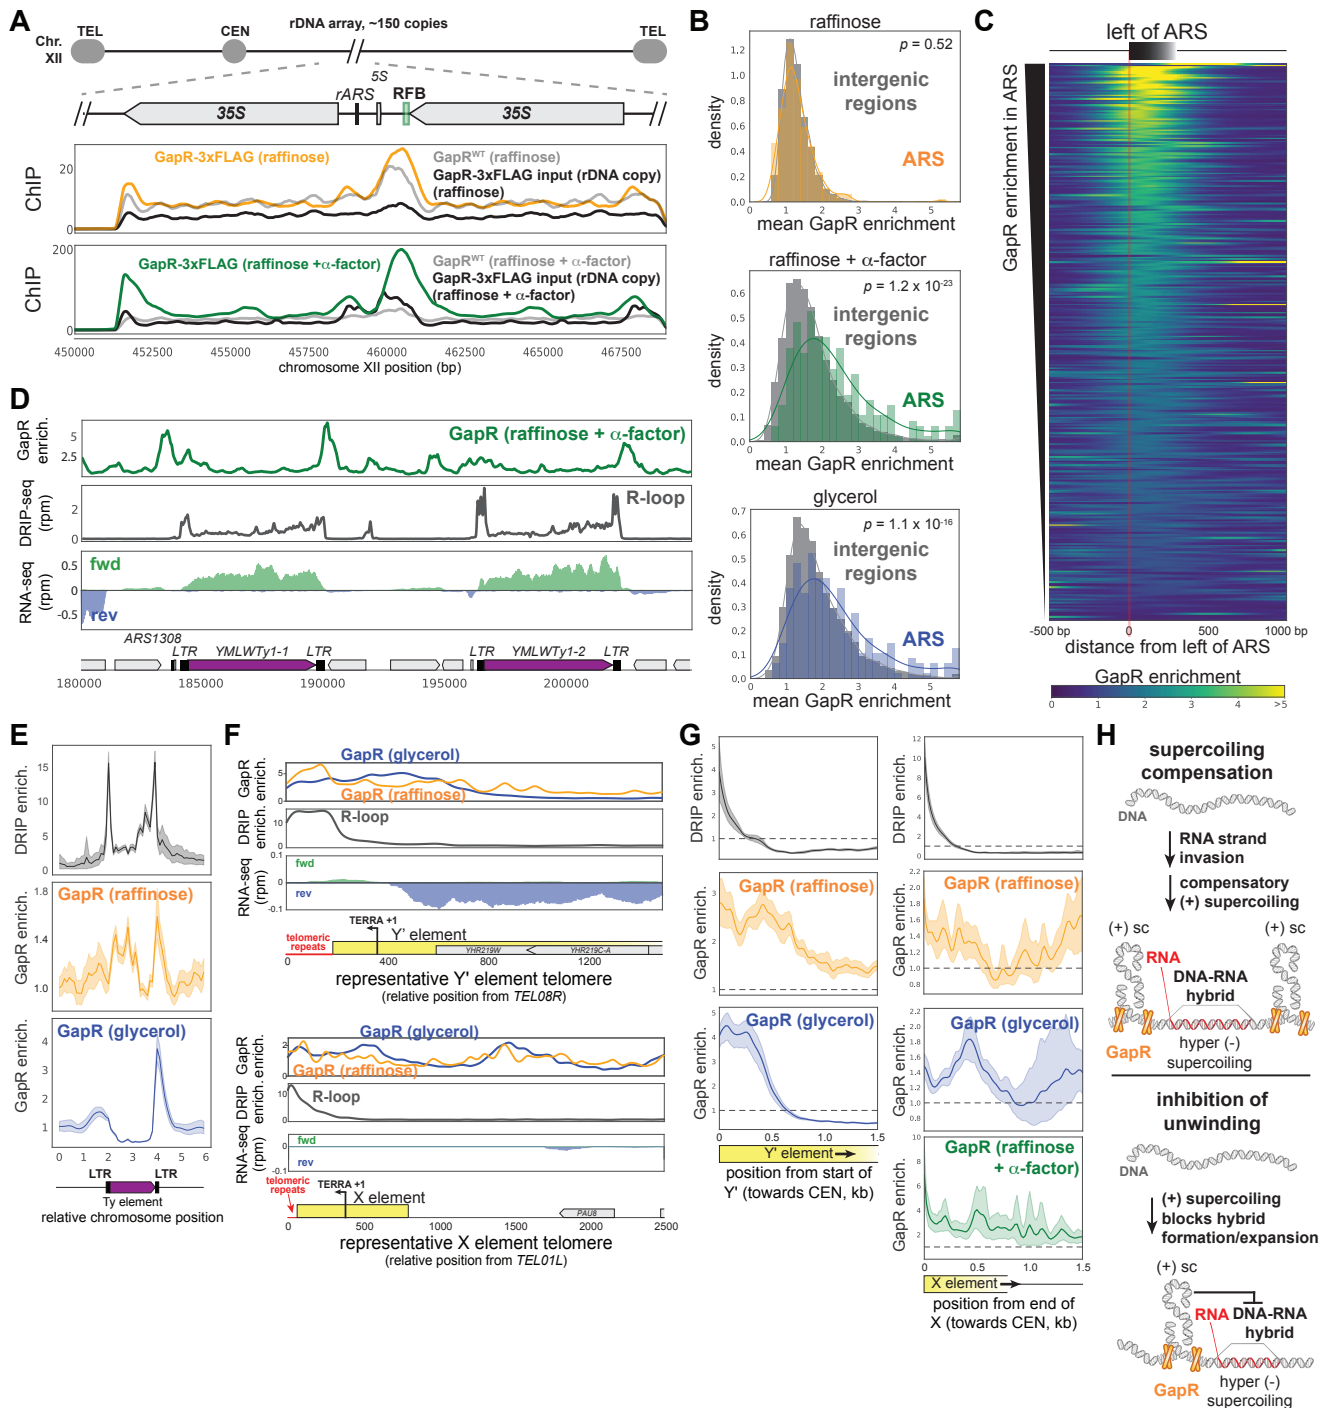

**Figure 7-figure supplement 1. GapR ChIP at rDNA, autonomously replicating sequences, and R-loops.**

**(A)** GapR ChIP with controls in the rDNA locus. GapR-3xFLAG ChIP, GapR-3xFLAG input, GapR ChIP in raffinose (top), GapR-3xFLAG ChIP, GapR-3xFLAG input, GapR ChIP in raffinose +  $\alpha$ -factor (bottom).

**(B)** GapR enrichment at autonomously replicating sequences (ARS) in cells grown in raffinose, after  $\alpha$ -factor arrest, and grown in glycerol. Student's t-test p-value is shown.

**(C)** Heatmap showing GapR enrichment (glycerol) at all ARS sorted by GapR enrichment.

**(D)** Examples of GapR enrichment near Ty elements (purple). GapR enrichment after  $\alpha$ -factor arrest (top), DNA-RNA hybrids by DRIP-seq (dark grey). Transcription from the forward (green) and reverse (blue) strands with annotated genes indicated (bottom).

**(E)** Alignment of GapR and DRIP enrichment surrounding all yeast Ty elements. Data indicate mean (solid line) with 95% confidence intervals (shaded area).

**(F)** Examples of GapR enrichment near a telomere with (top) or without (bottom) a Y' element, plotted as in **(D)**.

**(G)** GapR and DRIP enrichment at all telomeres with (left) and without (right) Y' elements, aligned from the end of the telomeric repeat. Data indicate mean (solid line) with 95% confidence intervals (shaded area). X element represents both the 'core' X element and any X element combinatorial repeats.

**(H)** Association of DNA-RNA hybrid (R-loop) forming regions and positive supercoiling.
