# Supplementary figures and images for: High-resolution, genome-wide mapping of positive supercoiling in chromosomes
Source: eLife journal article supplement (doi:10.7554/elife.67236), 2021-07-19

$\infty$  supercoiled  
 $\nabla$  nicked  
 $\circ$  relaxed

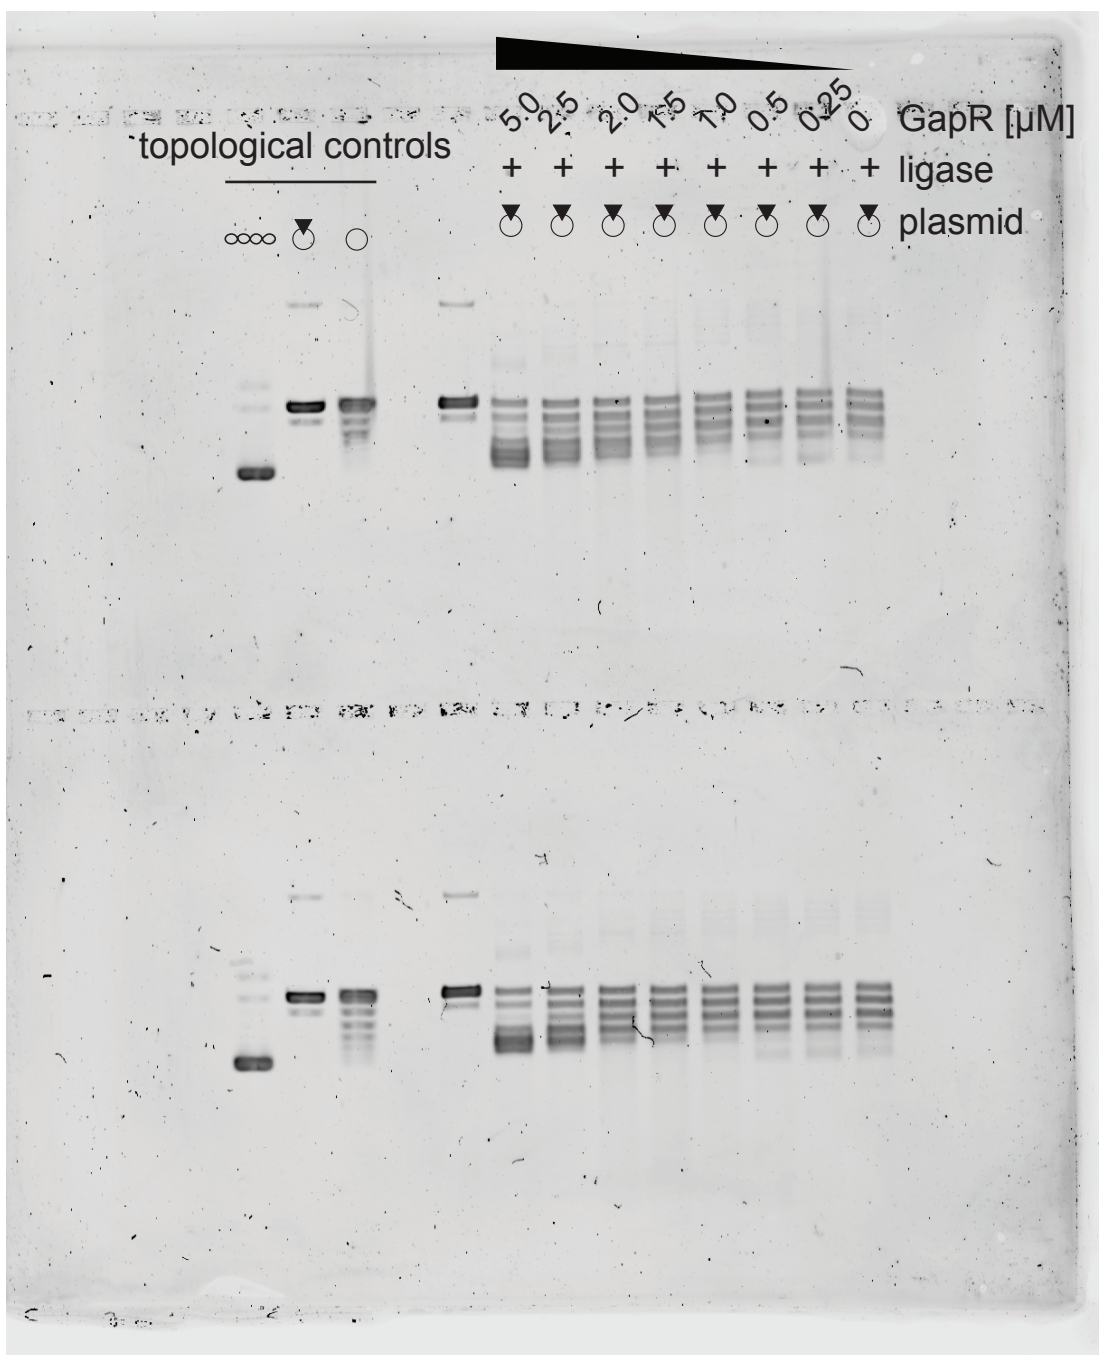

Supplement: fig1-data1 [file elife-67236-fig1-data1-v2.zip]

∞ supercoiled

⌢ nicked

○ relaxed

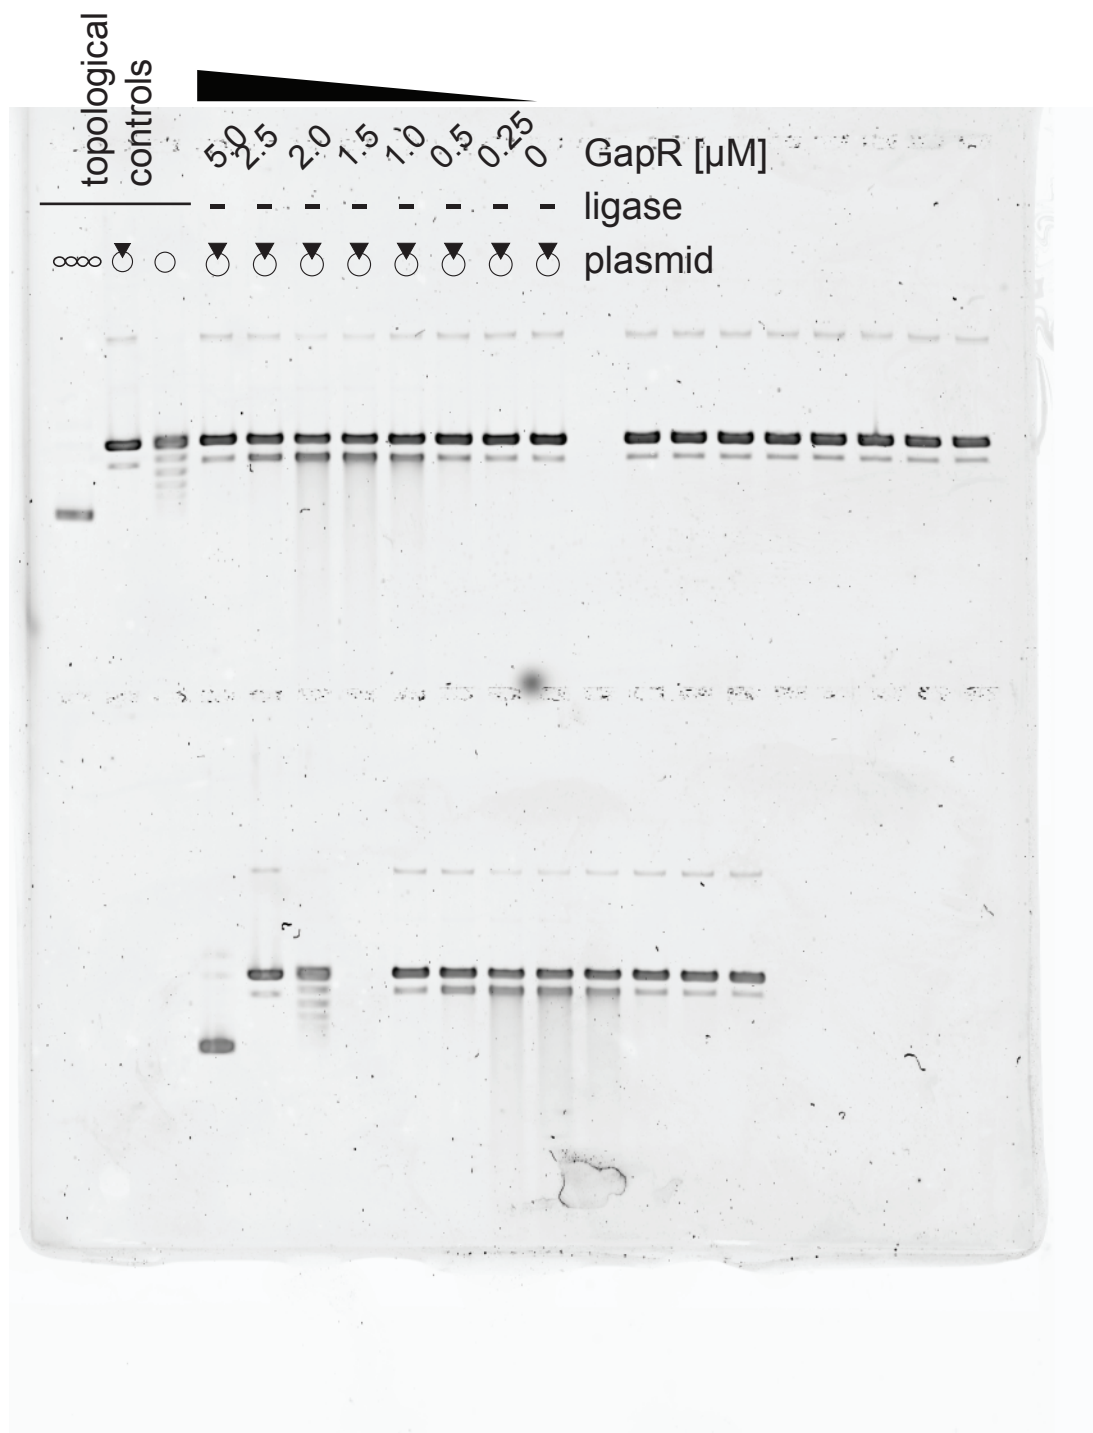

Supplement: fig1-figsupp1-data1 [file elife-67236-fig1-figsupp1-data1-v2.zip]

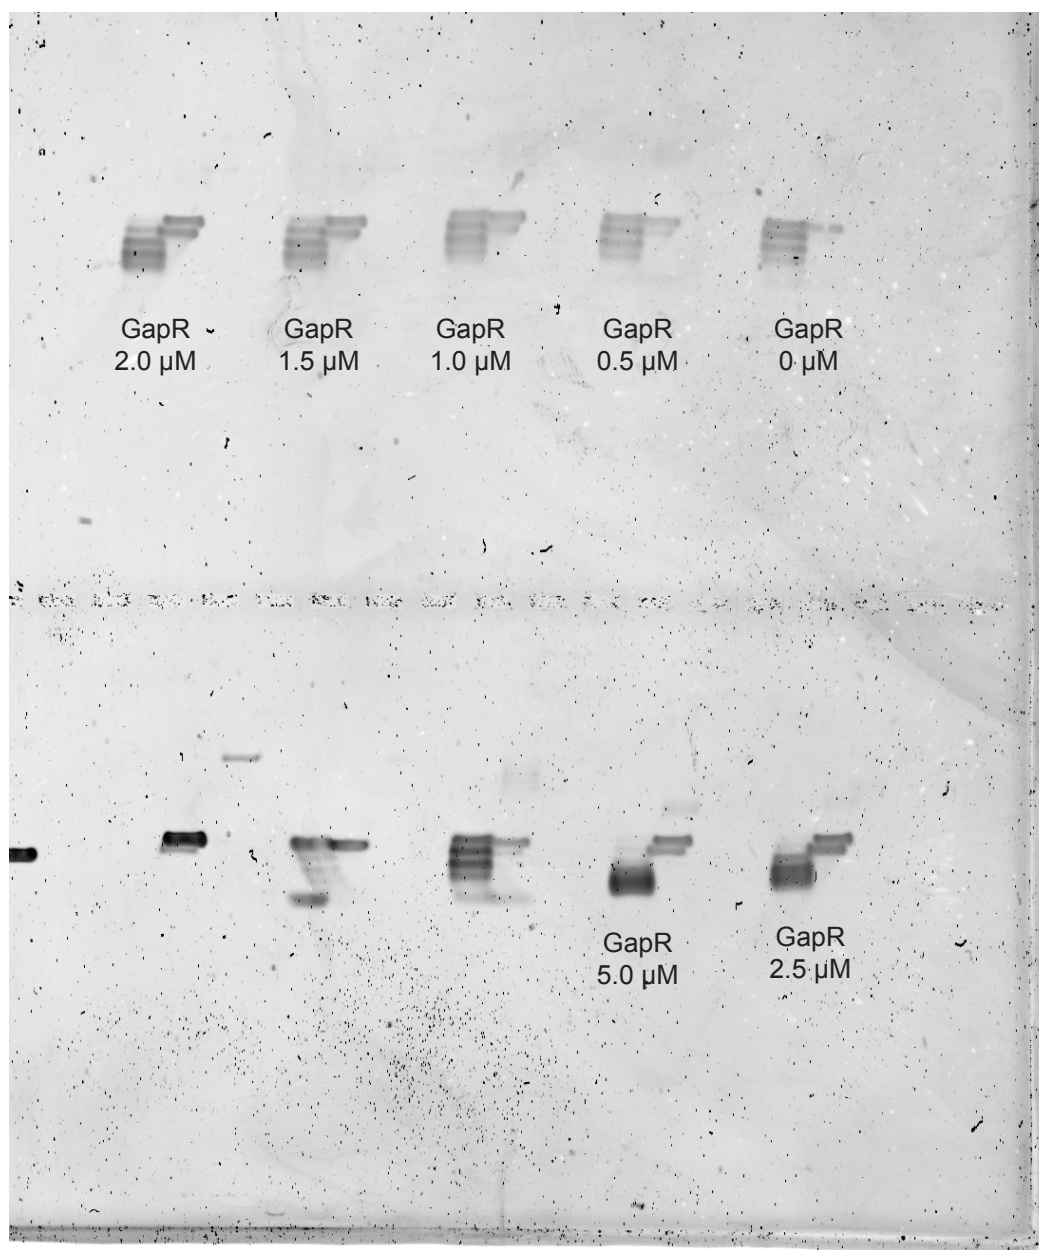

Supplement: fig1-figsupp1-data2 [file elife-67236-fig1-figsupp1-data2-v2.zip]

∞∞ supercoiled  
 ⌢ nicked  
 ○ relaxed

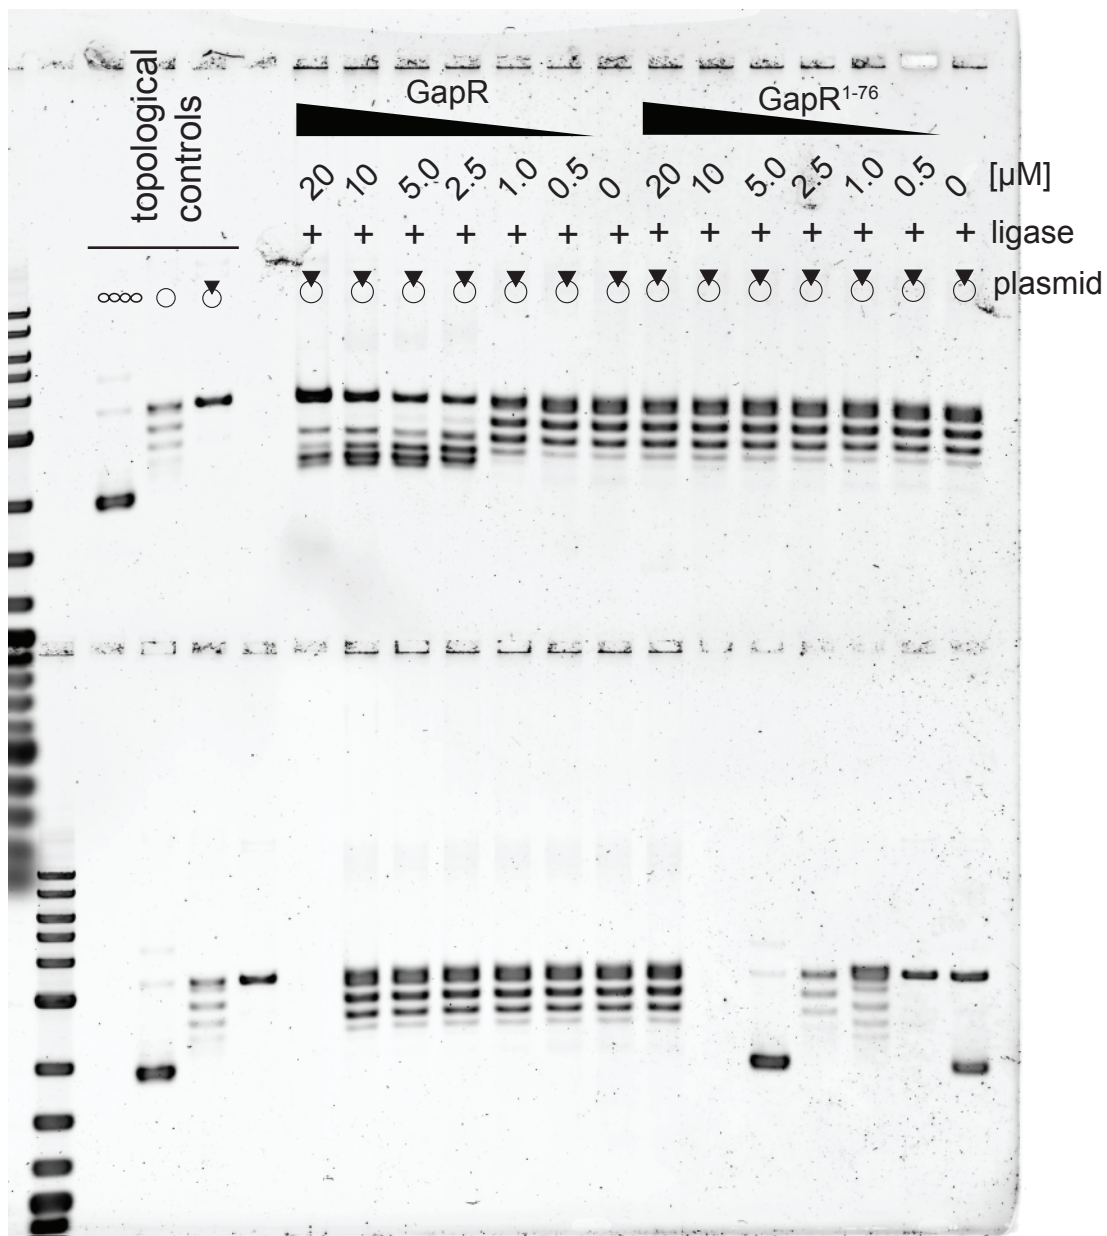

Supplement: fig3-data1 [file elife-67236-fig3-data1-v2.zip]

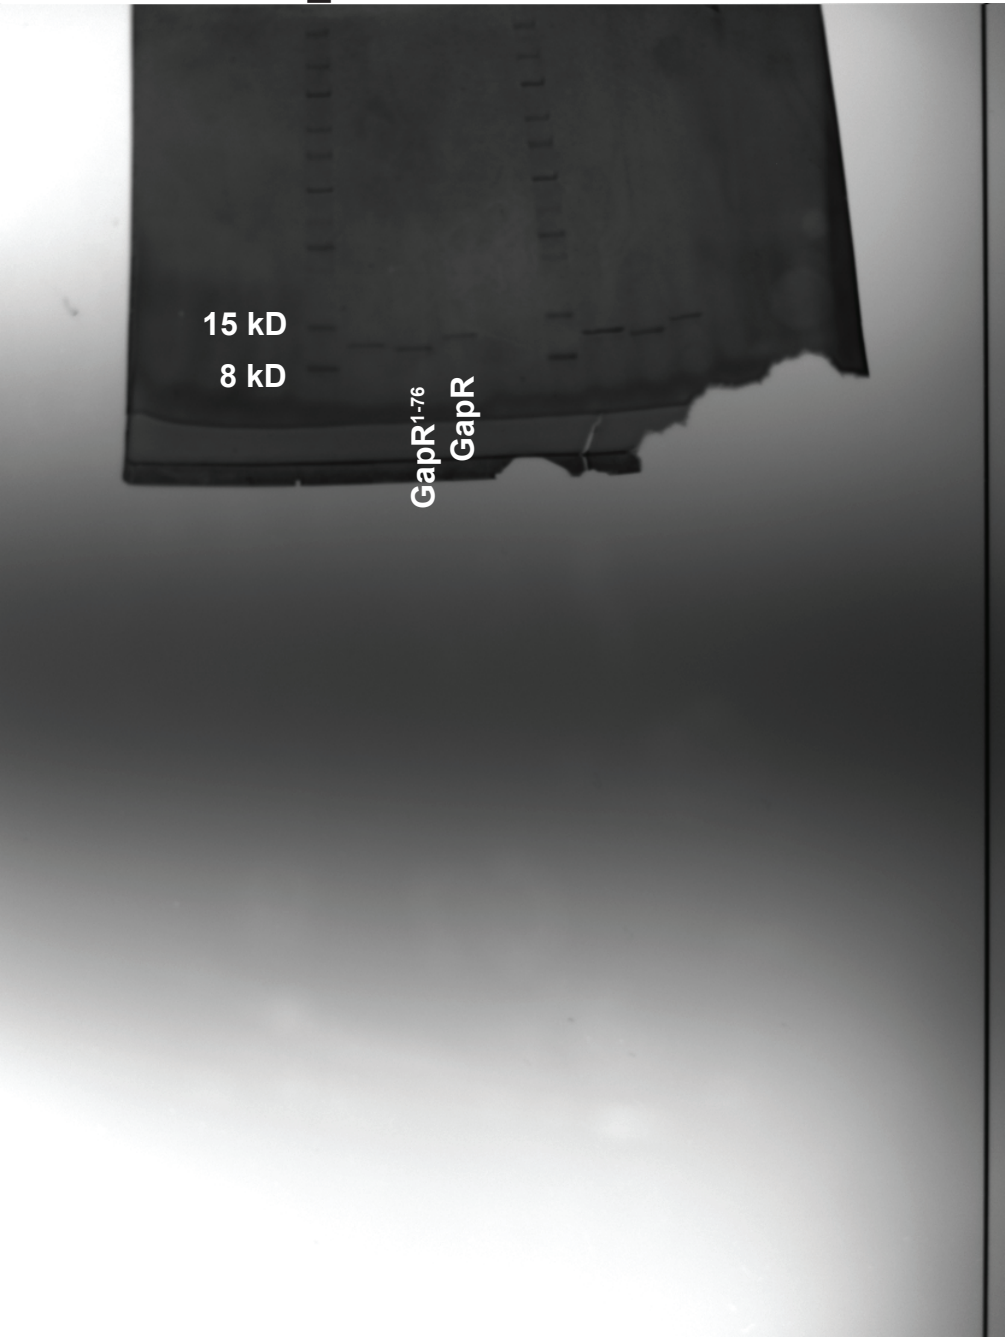

protein ladder

Supplement: fig3-figsupp1-data1 [file Figure 3-figure supplement 1A-source data 1_labeled.pdf › Figure 3-figure supplement 1A-source data 1_labeled.pdf]

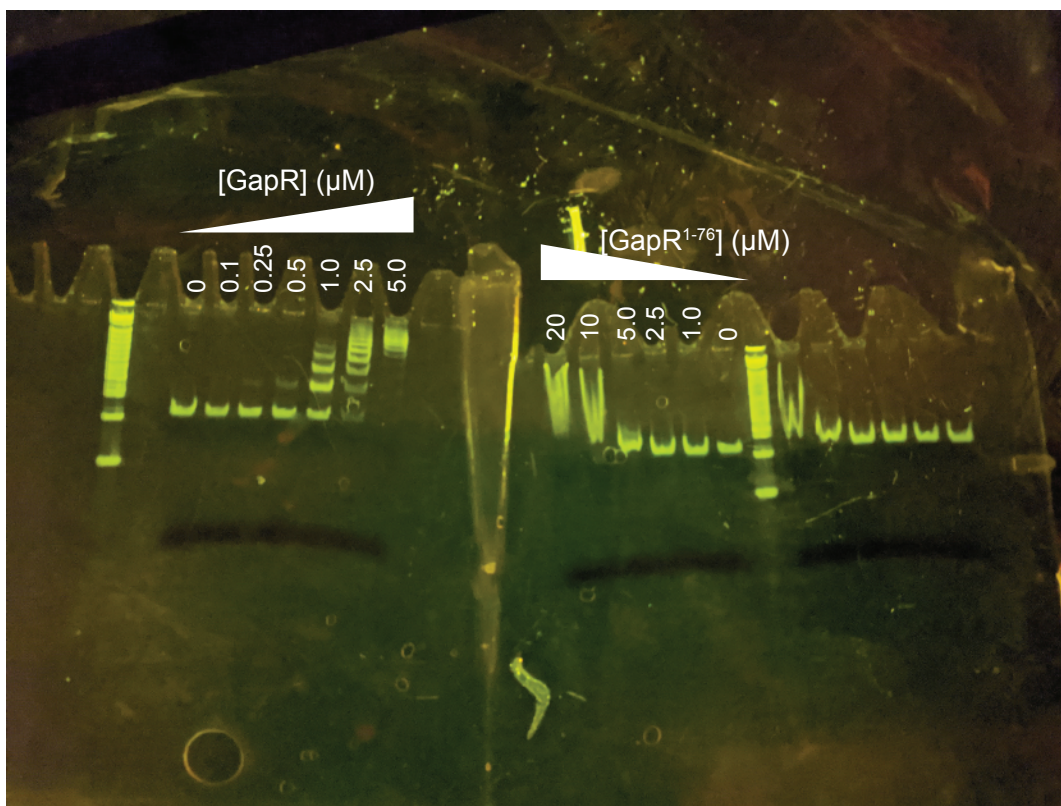

Supplement: fig3-figsupp1-data2 [file elife-67236-fig3-figsupp1-data2-v2.zip]

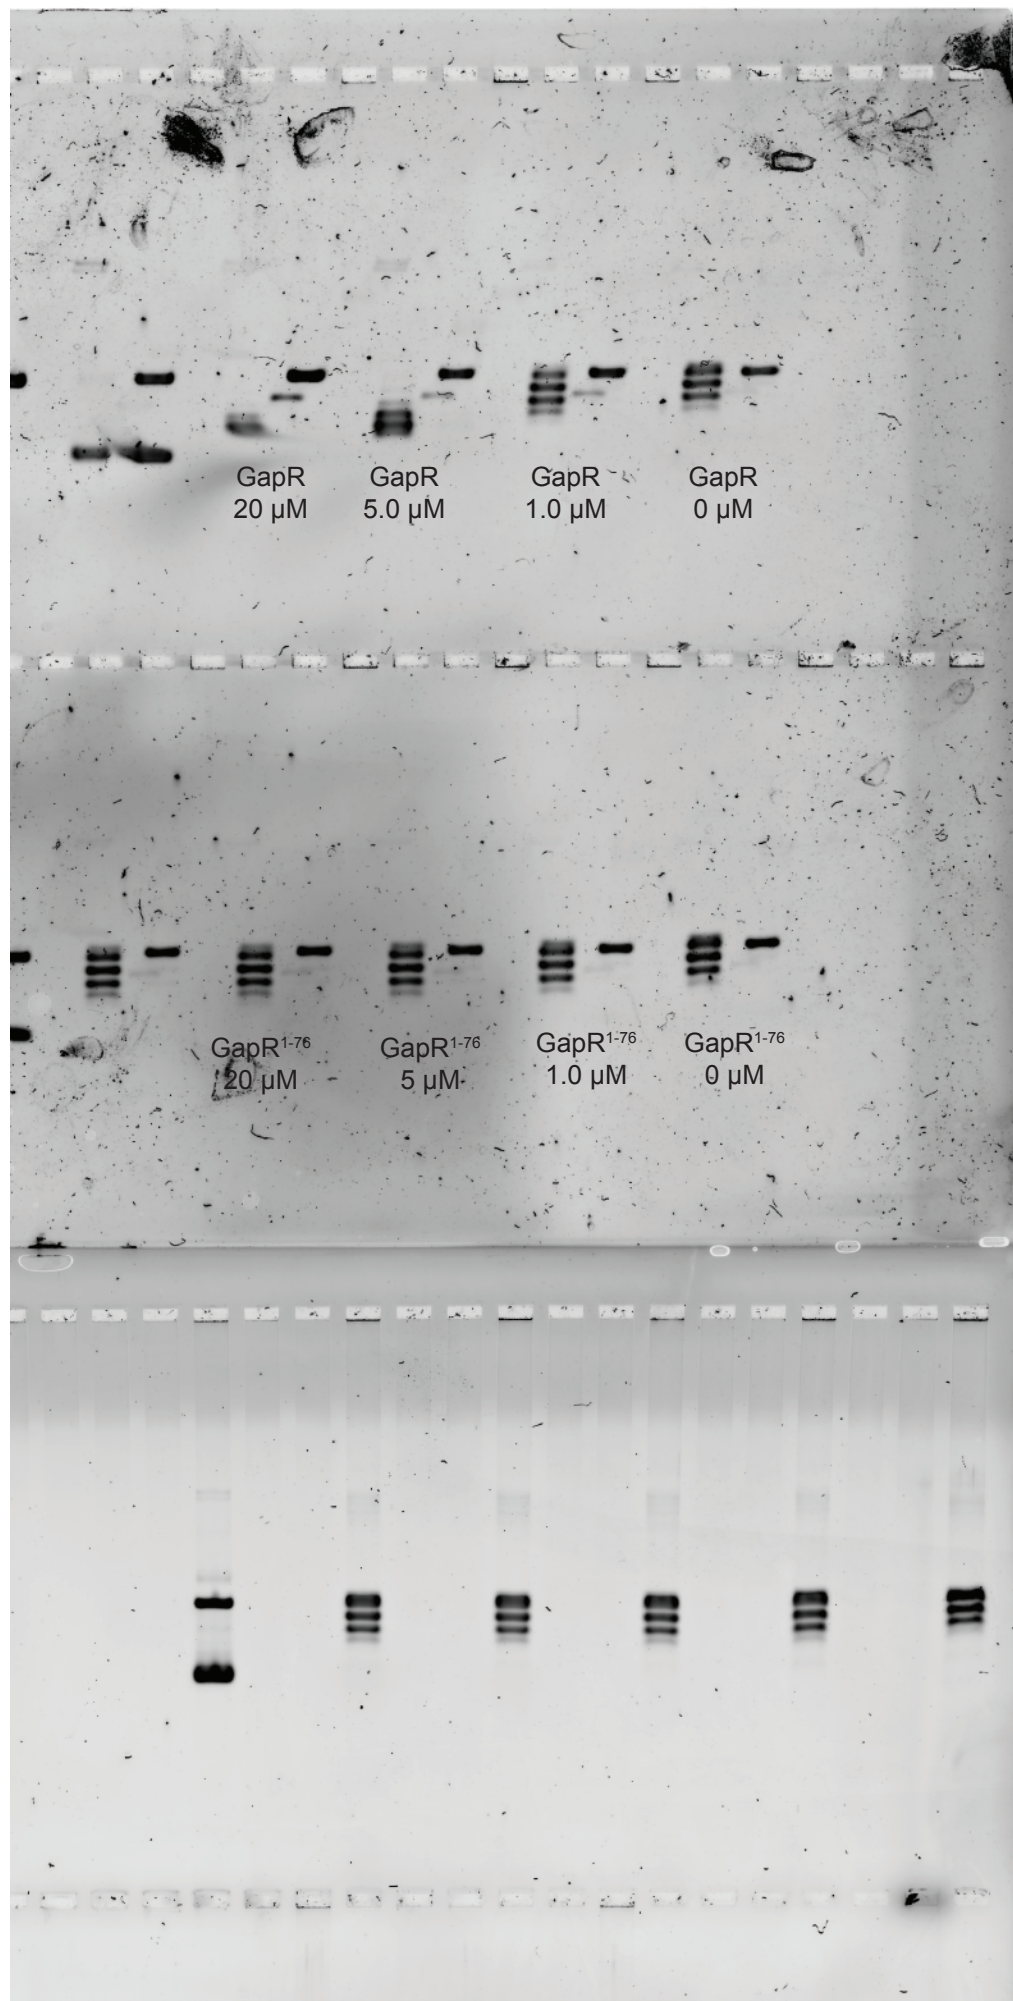

Supplement: fig3-figsupp1-data3 [file Figure 3-figure supplement 1C-source data 3-labeled.pdf › Figure 3-figure supplement 1C-source data 3-labeled.pdf]
